# Supplementary material
Source: publisher figshare collection journal article supplement (https://acs.figshare.com/ndownloader/files/12103052)
Supplement: Supplementary file 1 [file 12103052]

## **Supporting Information**

### **Synthesis of Mg/ Al Layered Double Hydroxides for Adsorptive Removal of Fluoride from Water: A Mechanistic and Kinetic Study**

Gautam Kumar Sarma and Md. Harunar Rashid\*

Department of Chemistry, Rajiv Gandhi University, Rono Hills, Doimukh 791 112,

Arunachal Pradesh, India

\*Corresponding author e-mail: mhr.rgu@gmail.com

***Characterization of the prepared materials.*** All the as-prepared LDHs were characterized by different spectroscopic, microscopic and diffractometric techniques. For X-ray diffraction study, the dried solid powder samples were used and the diffractograms were recorded in a Rigaku Ultima IV X-ray diffractometer using Cu  $k_\alpha$  radiation with wavelength 0.154 nm. Fourier transforms infrared spectra (FTIR) of the powder samples were collected in a Thermo Scientific Nicolet iS5 spectrophotometer in the range of 4000 – 400  $\text{cm}^{-1}$ . The pellets for recording the FTIR spectra were prepared by mixing the powder sample with dried KBr in the weight ratio of 1:100. For electron microscopic study, a small amount of the dry powder samples were spread on a carbon tape pasted on an aluminium stub and the micrographs were then recorded in a field emission scanning electron microscope (FE-SEM) (Carl Zeiss Sigma) at an accelerating voltage of 5 kV. For transmission electron microscopic (TEM) studies, a drop of aqueous suspension of individual powder sample was cast on a carbon coated copper grid. The excess solutions were soaked with a tissue paper followed by drying in air. The micrographs were then recorded in a high-resolution JEOL electron microscope (JEM 2100EM) at an accelerating voltage of 200 kV.

The nitrogen (N<sub>2</sub>) gas adsorption–desorption isotherms of the LDHs were recorded at 77 K (Quantachrome Nova 1000 Instrument) after degassing the powder samples at 150 °C for 4 h in an inert atmosphere. BET specific surface area and pore diameter was determined from the adsorption-desorption isotherms following the well-known Barrett-Joyner-Halenda (BJH) method. The thermal analysis of the powder samples were carried out on a thermogravimetric analyzer (Mettler Toledo TGA/ DSC 1, Star<sup>e</sup> system) under N<sub>2</sub> atmosphere. Zeta potential measurement of the colloidal suspension of LDH was performed in a Malvern Zetasizer (Malvern Instruments; Nano-ZS) instrument. Atomic absorption spectroscopic (AAS) study on LDH sample was carried out on a Thermo Scientific AAS instrument (iCE-2500) in flame mode using air-acetylene/ nitrous oxide gas. X-ray photoelectron spectroscopy study was carried out on FEI PHI Versa Probe II Instrument using Al k<sub>α</sub> source under ultra high vacuum condition.

**Table S1:** Experimental conditions for fluoride-LDH interactions

|                                              |                                                             |
|----------------------------------------------|-------------------------------------------------------------|
| pH                                           | 4.0-10.0 (at unit interval)                                 |
| Interaction time (min)                       | 5, 10, 15, 20, 30, 45, 60, 90, 120, 150, 180, 240, 300, 360 |
| Amount of LDH (g L <sup>-1</sup> )           | 1, 2, 3, 4, 5                                               |
| Fluoride concentration (mg L <sup>-1</sup> ) | 2, 5, 7, 10, 15, 20, 25, 30                                 |
| Temperature (K)                              | 303 K                                                       |

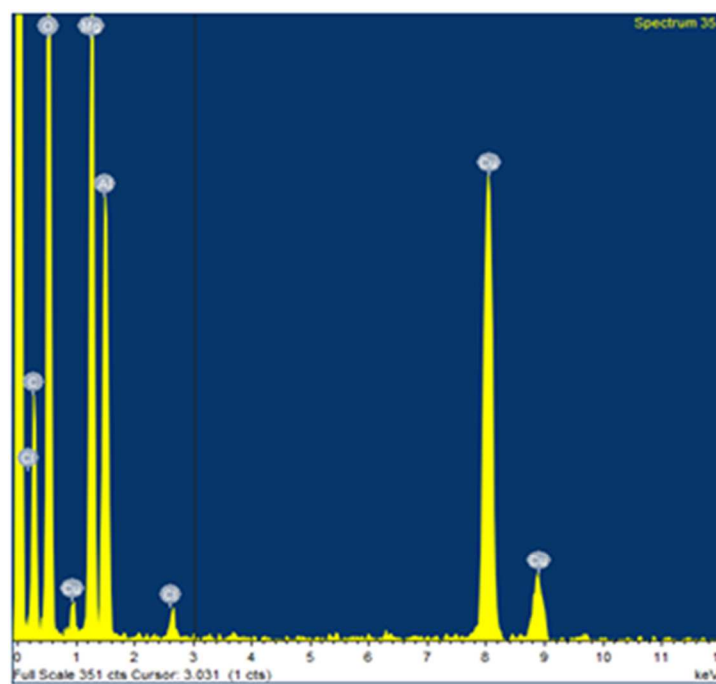

**Figure S1.** Energy dispersive X-ray spectra of LDH (sample Mg\_Al-6).

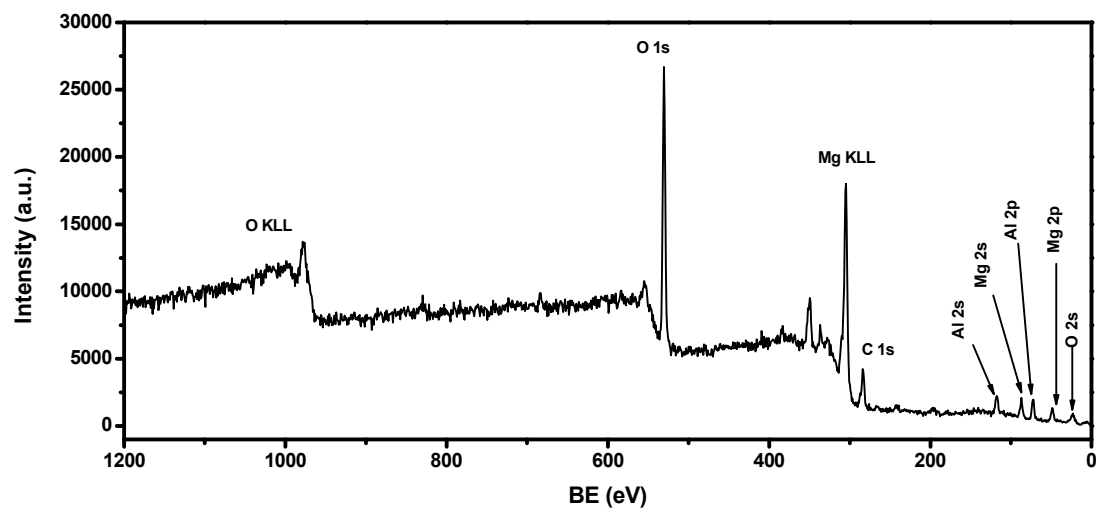

**Figure S2.** XPS survey scan spectrum recorded from sample Mg<sub>2</sub>Al<sub>3</sub>-6.

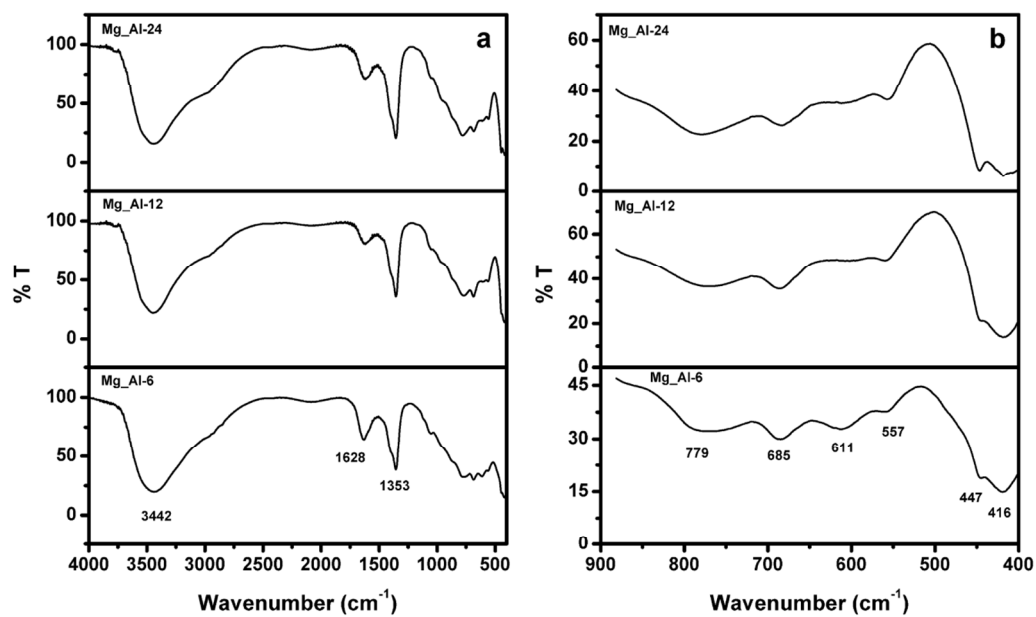

**Figure S3.** (a) FTIR spectra recorded from different LDH samples and (b) enlarged view of the region from 900 to 400 cm<sup>-1</sup>.

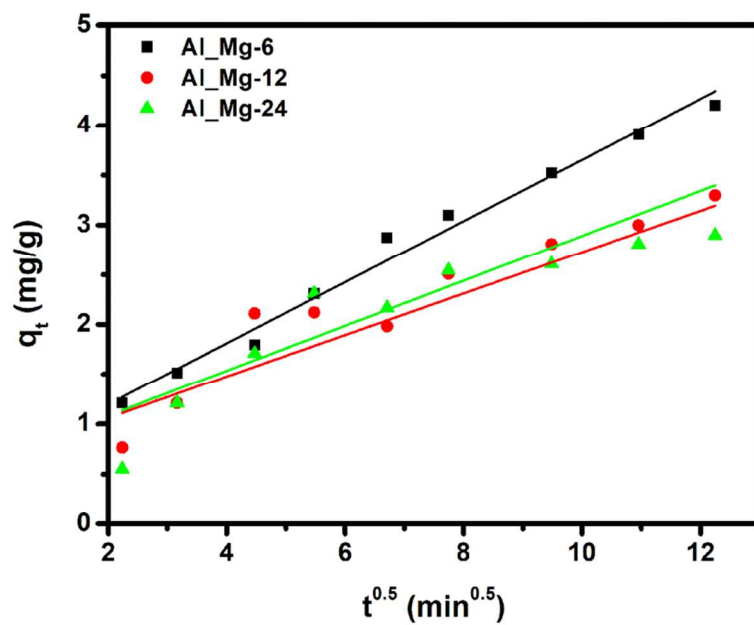

**Figure S4.** Plot showing the variation of  $q_t$  versus.  $t^{0.5}$  on the basis of intra-particles diffusion rate equation.

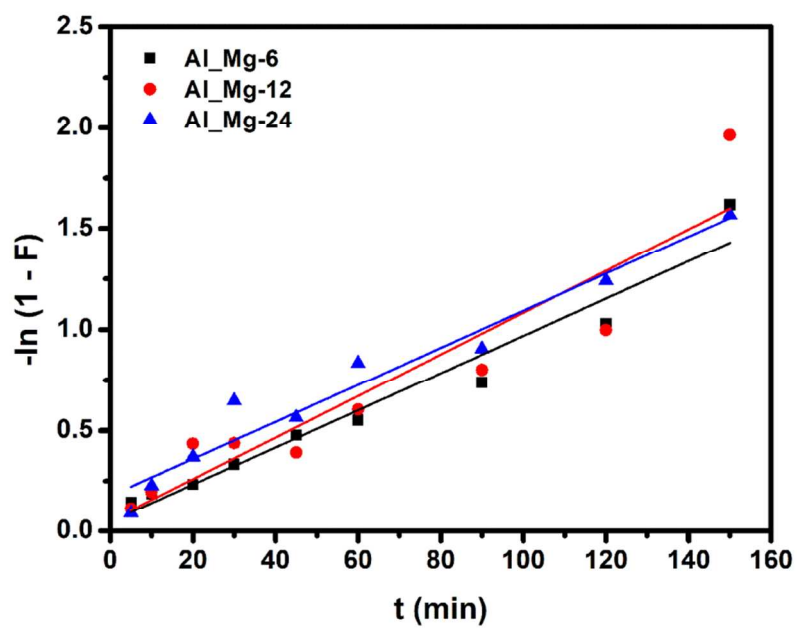

**Figure S5.** Plot showing the variation of  $-\ln (1 - F)$  versus  $t$  on the basis of liquid film diffusion model.

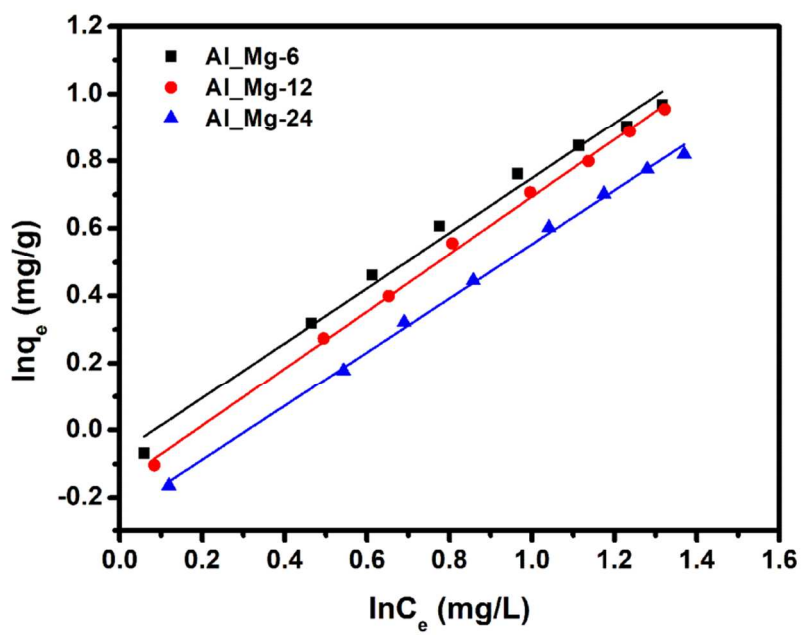

**Figure S6.** Plot showing the variation of  $\ln q_e$  versus  $\ln C_e$  on the basis of Freundlich adsorption isotherm.

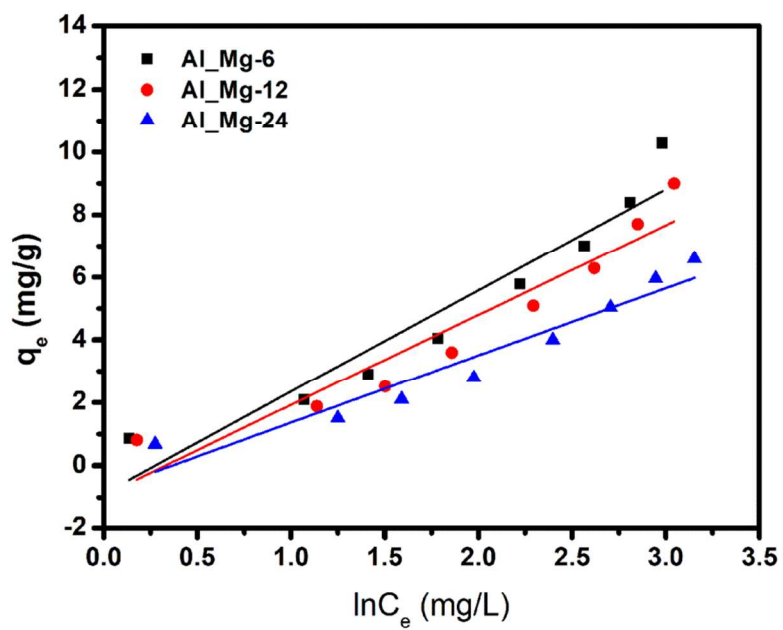

**Figure S7.** Temkin isotherm plots ( $q_e$  versus  $\ln C_e$ ) for fluoride adsorption on LDHs

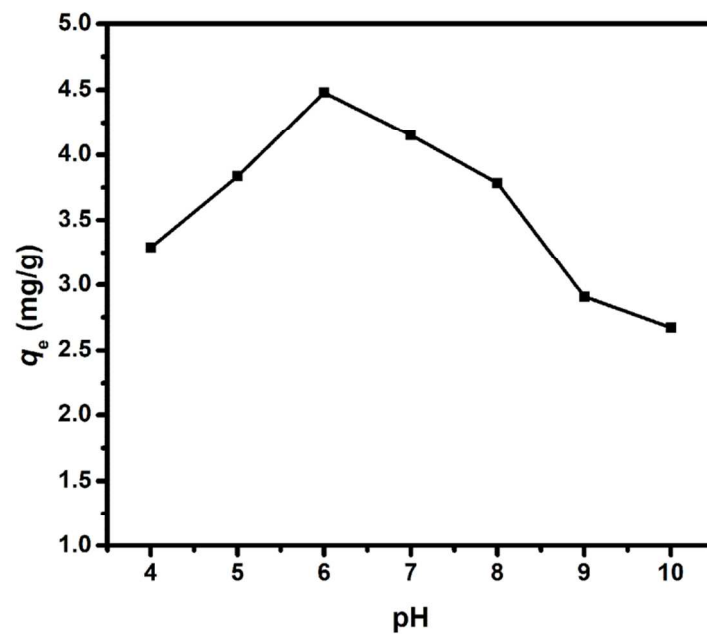

**Figure S8.** Effect of pH on adsorption of fluoride (10 mg L<sup>-1</sup>) on LDH (sample Mg\_Al-6).

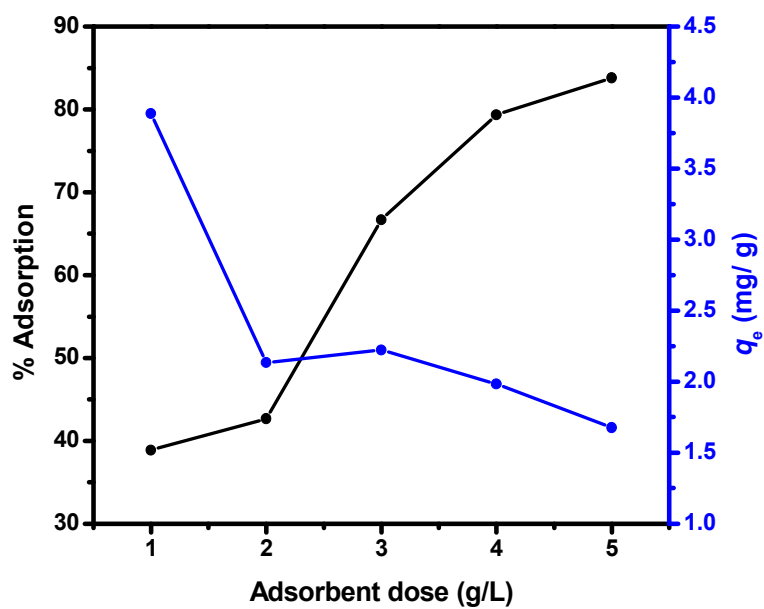

**Figure S9.** Plots showing the variations of %adsorption and effective adsorption,  $q_e$  of fluoride with dose of adsorbent.

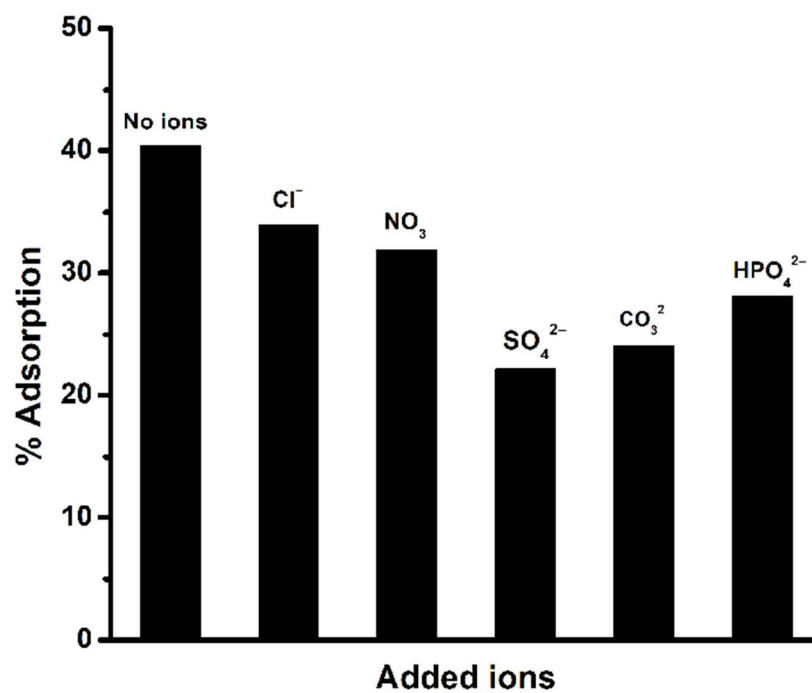

**Figure S10.** Variation of adsorption of fluoride in presence of different monovalent and bivalent anions.

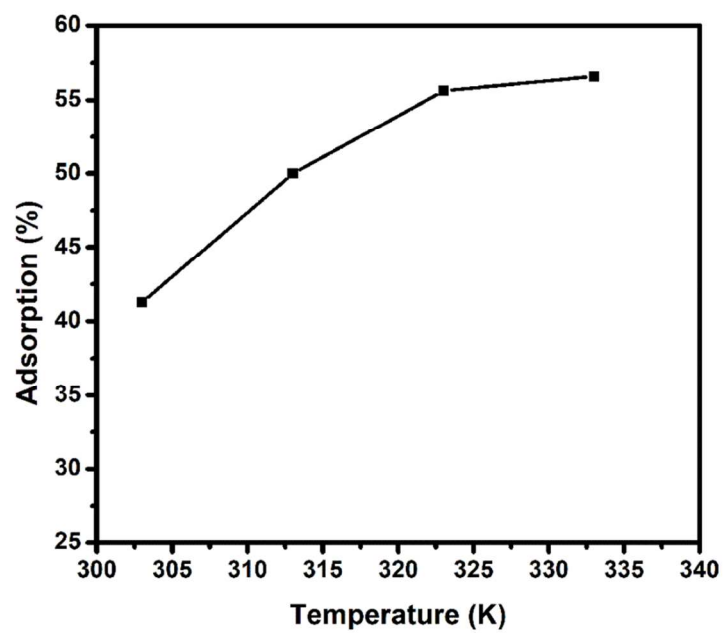

**Figure S11.** Variation of adsorption (%) with temperature for removal of fluoride by LDH.

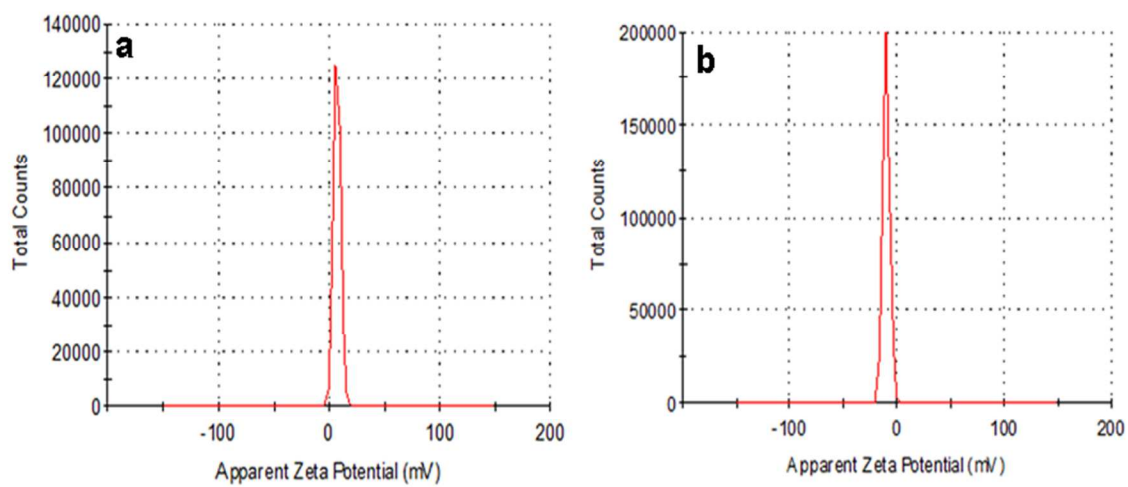

**Figure S12.** Zetal potential curves of LDHs (a) before and (b) after  $F^-$  ions adsorption.

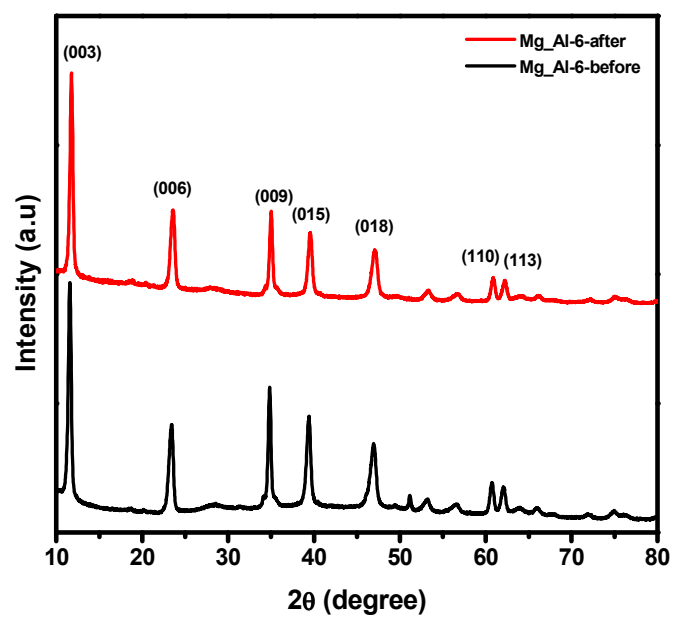

**Figure S13.** XRD patterns of LDH before and after fluoride adsorption.

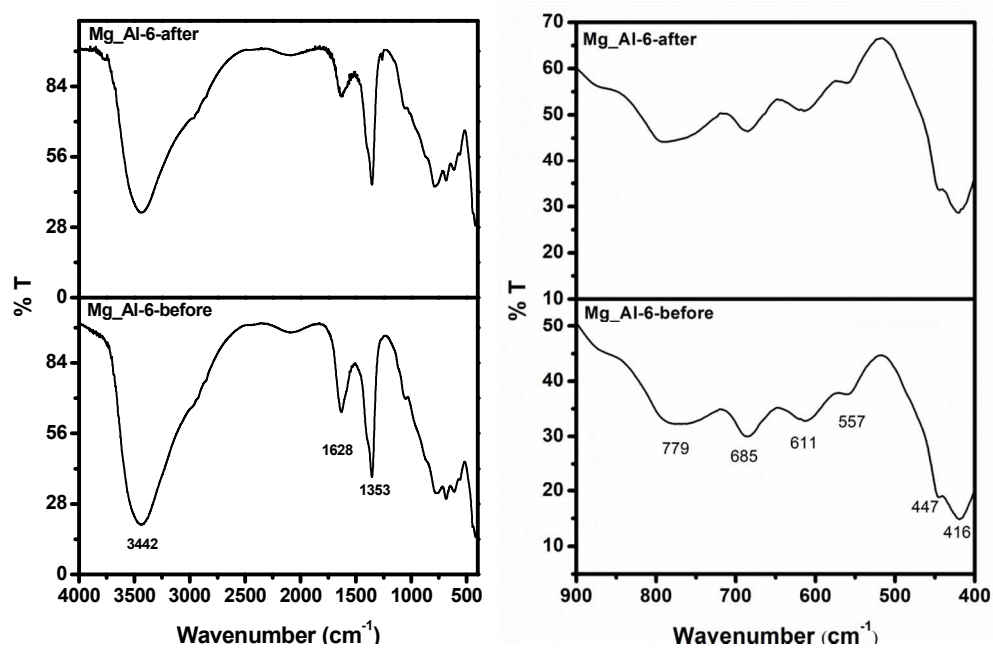

**Figure S14.** FTIR spectra of LDH before and after fluoride adsorption.

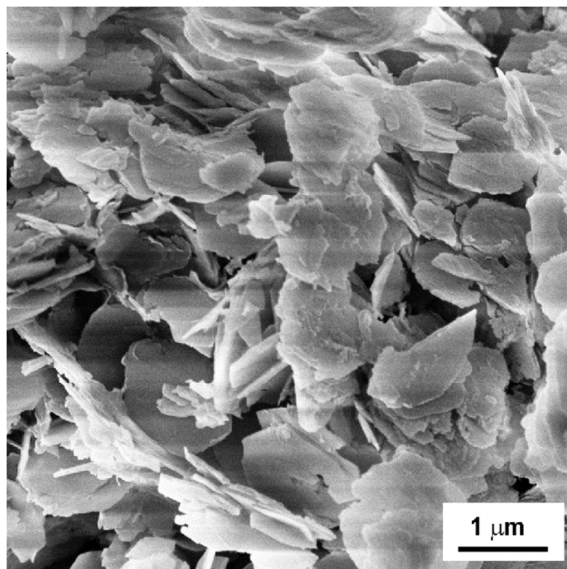

**Figure S15.** SEM images of recovered LDH (sample Mg\_Al-6) after fluoride adsorption.
